# Supplementary material
Source: PubMed Central journal article supplement (PMC3438987)
Supplement: supp_M112.392720_jbc.M112.392720-1.pdf [file supp_M112.392720_jbc.M112.392720-1.pdf]

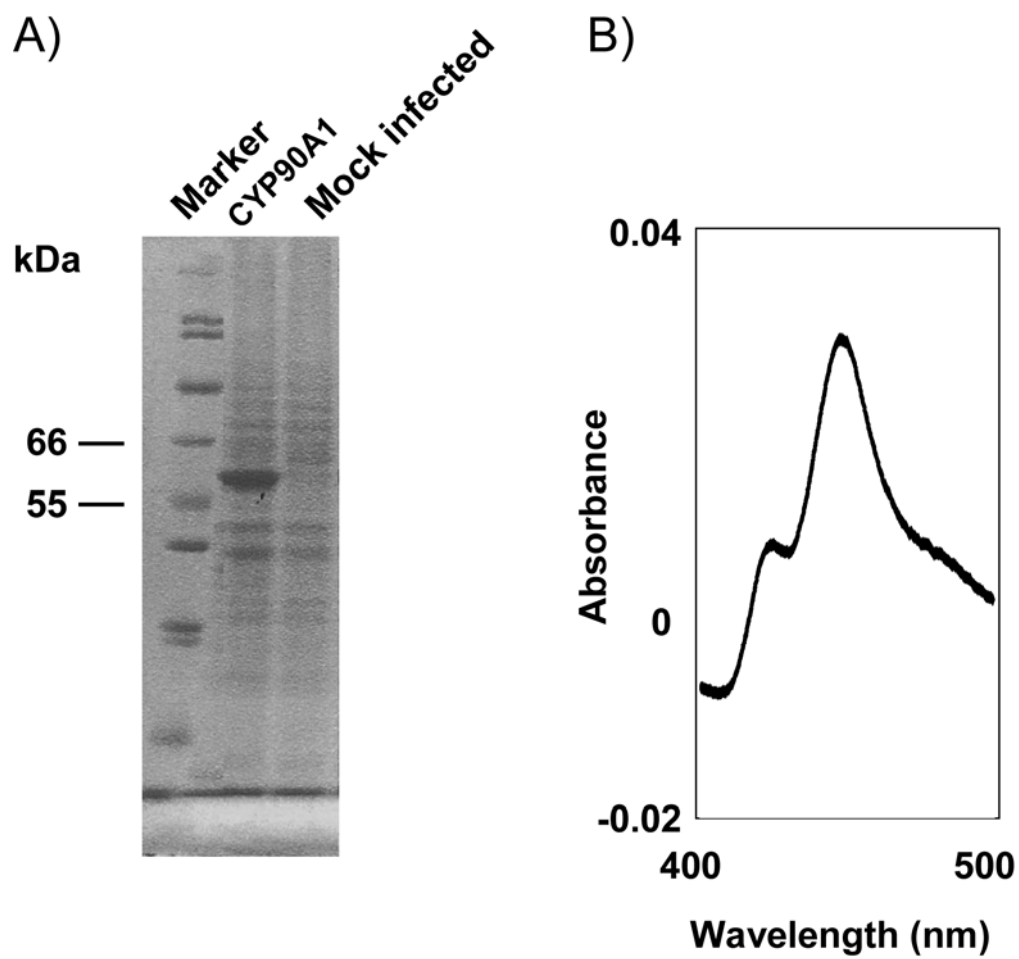

Supplemental Figure 1. Heterologous expression of the CYP90A1/CPD proteins in baculovirus-insect cell system.

SDS-polyacrylamide gel electrophoresis of microsome samples (15  $\mu$ g protein) prepared from mock-infected cells (without baculovirus infection) and cells expressing CYP90A1/CPD (A). Reduced CO-difference spectrum of the recombinant CYP90A1/CPD (B).
